# Supplementary material for: Electrochemical DNA Sensor for Valrubicin Detection Based on Poly(Azure C) Films Deposited from Deep Eutectic Solvent
Source: MDPI journal article supplement (doi:10.3390/bios13100931), 2023-10-18
Supplement: s1 [file s1]

## Electronic Supporting Information

To the article of Porfireva A.V., Begisheva E.A., Evtugyn V.G., Evtugyn G.A.  
“Electrochemical DNA-Sensor for Valrubicin Detection Based on Poly(Azure C) Films  
Deposited from Deep Eutectic Solvent”

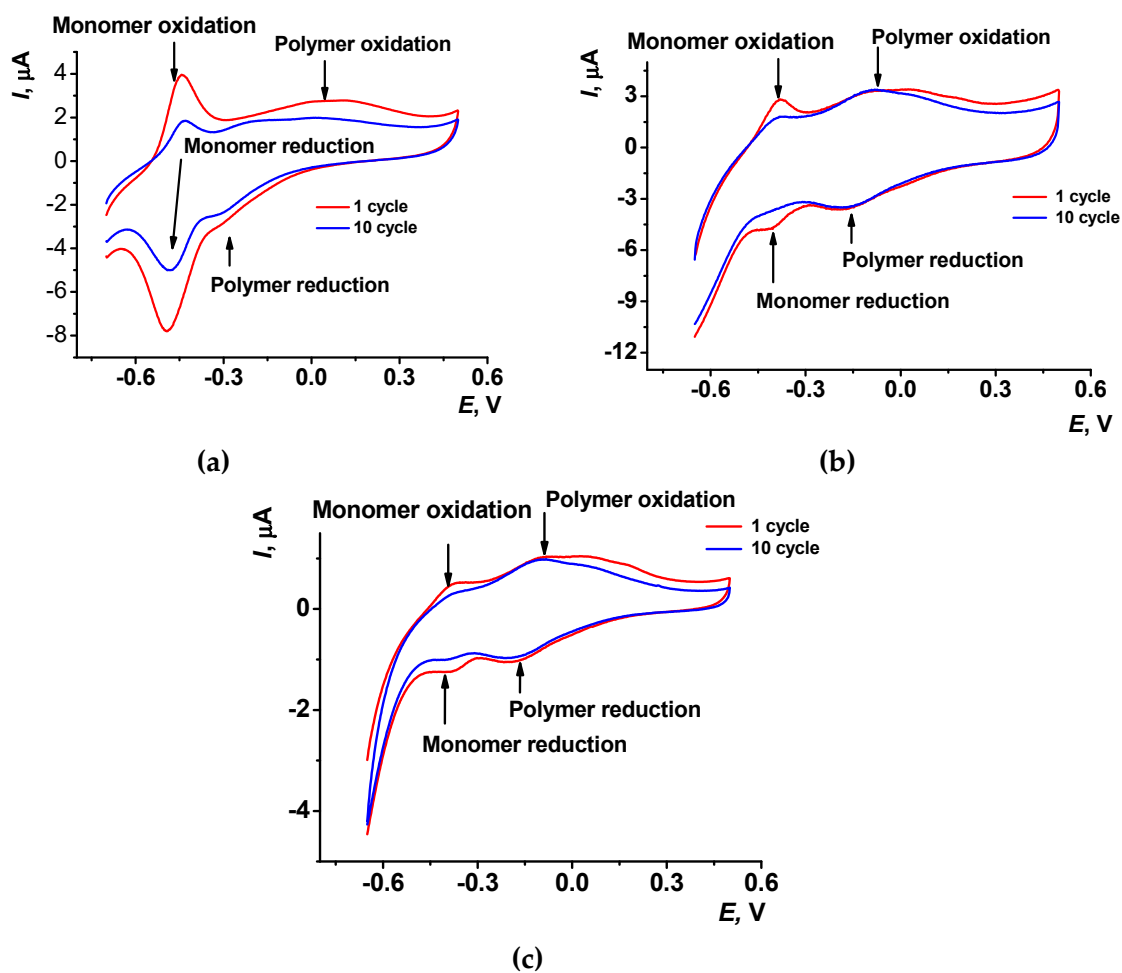

**Figure S1.** Changes in cyclic voltammograms of (a) PAC1, (b) PAC2, (c) PAC3 layers under the signal stabilization. First and tenth voltammograms are shown. 0.1 M PB, pH = 7.0, between -0.7 and 0.5 V for PAC1, between -0.65 and 0.5 V for PAC2 and PAC3, 0.15 V/s.

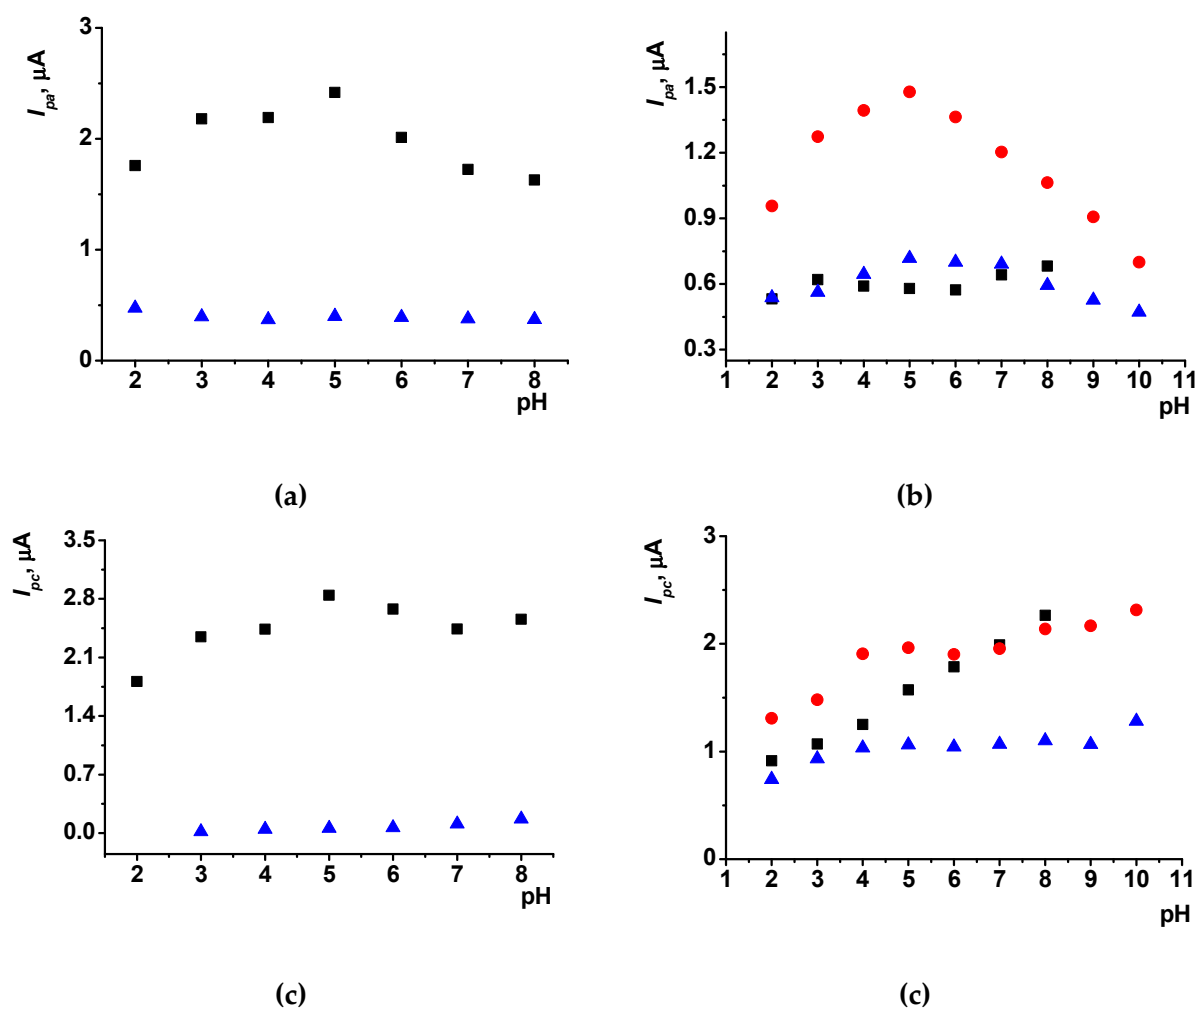

**Figure S2.** The pH dependence of the monomer (a) and polymer (b) oxidation peak currents, monomer (c) and polymer (d) reduction peak currents. Measurements in 0.1 M PB, pH 2.0–10.0. SPCE modified with PAC1 (black symbols), PAC2 (red symbols) and PAC3 (blue symbols).

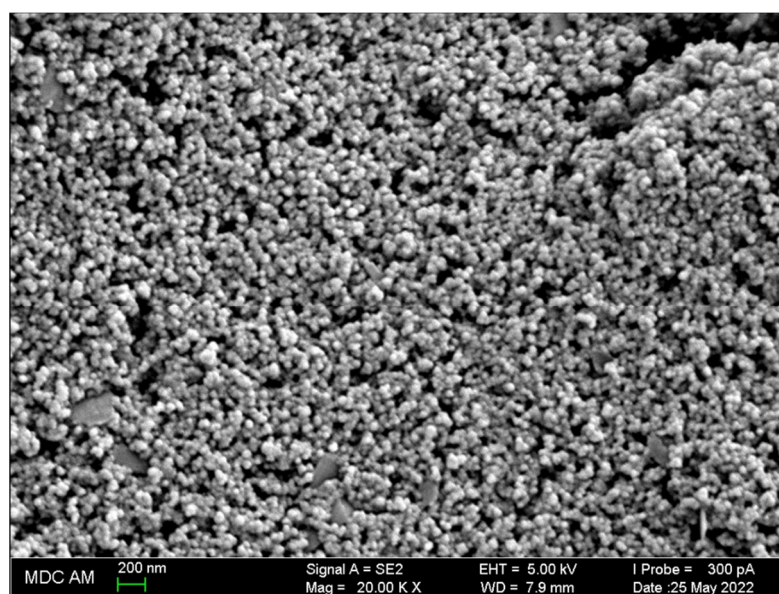

**Figure S3.** SEM image of the bare SPCE
